# Supplementary material
Source: publisher figshare collection journal article supplement (https://geolsoc.figshare.com/ndownloader/files/22364265)
Supplement: Supplementary file 1 [file 22364265]

## Sheet: calibration carbonates
			Gas Bench Carbonates
			Date:		2017-05-12
			Operator:		BEG
			Standard		d13C (VPDB)	d18O (VPDB)	d18O VSMOW	d13C (raw)	d18O (raw)
					actual			measured
			NBS-19		1.95	-2.2	28.6	4.06335	30.0892
			NBS-18		-5.014	-23.2	7.2	-2.9485	8.47275
			Iceland Spar		-8.16	-11.3	19.23
			LSVEC		-46.6	-26.7
			WS-1		0.74	-3.35	26.2
			UTM		4.49	-4.28	26.4977
			Carrera
			Calibration	slope	intercept		linearity	peak area
			carbon_pdb	0.993176	-2.08562		-0.0038	0
			oxygen_PDB	0.971485	-31.4311		-0.0012	0
											Linearity correction		Peak area Correction		Corrected
	Row	Identifier 1	Comment		Ampl 44	Area 44	d 13C/12C	d 18O/16O	stdev d13C	stdev d18O	d13C	d18O	d13C	d18O	d13C (PDB)	d18O(pdb)	d18O(smow)
	1	UTM1	0		6174	39.135	6.4185	27.821	0.0184581	0.0497644	6.4185	27.821	6.4185	27.821	4.28908	-4.40347	26.3804
	2	UTM2	0		10977	67.918	6.417	27.9475	0.0282613	0.0451608	6.4208	27.9487	6.4208	27.9487	4.29136	-4.27941	26.5083
	3	NBS18_1	0		12814	81.393	-2.948	8.4685	0.0151559	0.0244274	-2.9404	8.4709	-2.9404	8.4709	-5.00596	-23.2018	7.0008
	4	NBS18_2	0		13966	86.356	-2.968	8.471	0.0357701	0.0368198	-2.9566	8.4746	-2.9566	8.4746	-5.02204	-23.1982	7.00451
	5	NBS19_1	0		9939	62.699	4.121	30.149	0.0853464	0.0947275	4.1362	30.1538	4.1362	30.1538	2.02235	-2.13719	28.7167
	6	NBS19_2	0		11539	72.017	3.9715	30.0185	0.0262488	0.0320905	3.9905	30.0245	3.9905	30.0245	1.87765	-2.26281	28.5872
	7	UTM3	0		16709	104.909	6.892	28.4015	0.0858283	0.0733328	6.9148	28.4087	6.9148	28.4087	4.78199	-3.83253	26.969
	8	L11	0		10126	63.901	4.7625	25.507	0.0230976	0.0433912	4.7891	25.5154	4.7891	25.5154	2.6708	-6.64333	24.0713
	9	SB6	0		9354	58.306	4.7765	27.3955	0.263472	0.216397	4.8069	27.4051	4.8069	27.4051	2.68848	-4.80751	25.9638
	10	SB13	0		16981	106.044	4.4095	25.23	0.0442176	0.0443001	4.4437	25.2408	4.4437	25.2408	2.32775	-6.9101	23.7962
	11	SB21	0		15020	95.713	1.229	26.416	0.0772477	0.0828625	1.267	26.428	1.267	26.428	-0.827267	-5.75675	24.9853
	12	SB3	0		16927	105.234	6.8495	25.368	0.0399036	0.0413316	6.8913	25.3812	6.8913	25.3812	4.75865	-6.7737	23.9369
	13	N21	0		19924	127.013	4.0685	25.051	0.429443	0.259374	4.1141	25.0654	4.1141	25.0654	2.0004	-7.0805	23.6206
	14	SB10	0		19360	120.178	4.311	25.162	0.0501478	0.0308432	4.3604	25.1776	4.3604	25.1776	2.24502	-6.9715	23.7329
	15	SB25	0		26575	169.217	1.8815	25.3725	0.137267	0.0808344	1.9347	25.3893	1.9347	25.3893	-0.164124	-6.76583	23.945
	16	UTM	0		13518	84.886	6.5	28.063	0.0292284	0.0368944	6.557	28.081	6.557	28.081	4.42663	-4.15089	26.6408
	17	SB27	0		15648	98.174	1.3855	25.5955	0.0921124	0.0744695	1.4463	25.6147	1.4463	25.6147	-0.649191	-6.54686	24.1707
	18	SB28	0		4788	29.956	-1.9975	30.567	0.0168315	0.0471402	-1.9329	30.5874	-1.9329	30.5874	-4.00533	-1.71596	29.151
	19	SB5	0		21610	136.064	6.154	25.5935	0.160008	0.118447	6.2224	25.6151	6.2224	25.6151	4.09432	-6.54647	24.1711
	20	SB7	0		6680	42.328	4.2015	25.603	0.014639	0.0328968	4.2737	25.6258	4.2737	25.6258	2.15891	-6.53608	24.1818
	21	SB18	0		6235	38.501	1.262	31.331	0.0471996	0.0454401	1.338	31.355	1.338	31.355	-0.756752	-0.970246	29.9198
	22	SB29	0		12911	82.234	-7	26.746	0.0244131	0.0410512	-6.9202	26.7712	-6.9202	26.7712	-8.9586	-5.42334	25.329
	23	SB12	0		15530	96.164	4.577	25.2755	0.0688426	0.0590948	4.6606	25.3019	4.6606	25.3019	2.54317	-6.85074	23.8574
	24	SB17	0		13326	84.117	4.4525	30.0195	0.0444241	0.0498167	4.5399	30.0471	4.5399	30.0471	2.4233	-2.24085	28.6099
	25	UTM	0		9990	62.071	6.7625	28.2175	0.149554	0.100859	6.8537	28.2463	6.8537	28.2463	4.72131	-3.9903	26.8063
	26	SB19	0		7748	48.594	-0.2955	27.112	0.0235542	0.0466154	-0.2005	27.142	-0.2005	27.142	-2.28475	-5.06311	25.7003
	27	SB19A	0		10025	62.657	-0.2105	27.241	0.0504252	0.0606276	-0.1117	27.2722	-0.1117	27.2722	-2.19656	-4.93662	25.8307
	28	SB11	0		13028	81.567	4.258	25.0425	0.032668	0.0543388	4.3606	25.0749	4.3606	25.0749	2.24522	-7.07127	23.6301
	29	SB24	0		9452	60.025	-1.44	31.374	0.155612	0.118138	-1.3336	31.4076	-1.3336	31.4076	-3.41012	-0.919146	29.9724
	30	SB2	0		14484	90.261	5.814	26.387	0.0245214	0.0475047	5.9242	26.4218	5.9242	26.4218	3.79815	-5.76277	24.979
	31	SB1	0		15152	96.568	7.197	28.715	0.348992	0.223148	7.311	28.751	7.311	28.751	5.17549	-3.49999	27.3118
	32	SB1A	0		12251	75.924	6.239	27.9835	0.0289085	0.0400837	6.3568	28.0207	6.3568	28.0207	4.2278	-4.20947	26.5804
	33	SB20	0		11386	71.961	1.8375	25.19	0.0795129	0.061027	1.9591	25.2284	1.9591	25.2284	-0.13989	-6.92214	23.7838
	34	UTM	0		14325	95.097	6.49	28.0785	0.0284289	0.045975	6.6154	28.1181	6.6154	28.1181	4.48463	-4.11484	26.6779
	35	SB26	0		10262	64.743	0.656	26.048	0.179482	0.138041	0.7852	26.0888	0.7852	26.0888	-1.30578	-6.08628	24.6455
	36	SB22	0		11595	71.862	0.9595	24.8725	0.0367804	0.0341365	1.0925	24.9145	1.0925	24.9145	-1.00058	-7.22709	23.4694
	37	SB8	0		25085	159.123	7.956	26.8835	0.523674	0.216809	8.0928	26.9267	8.0928	26.9267	5.95195	-5.27227	25.4847
	38	SB23	0		13936	88.4	1.67	25.8775	0.0201296	0.039119	1.8106	25.9219	1.8106	25.9219	-0.287377	-6.24842	24.4784
	39	SB15	0		13285	82.917	3.823	25.208	0.245757	0.154752	3.9674	25.2536	3.9674	25.2536	1.8547	-6.89766	23.8091
	40	TB1A	0		15152	96.333	-0.126	21.7535	0.0267899	0.0356202	0.0222	21.8003	0.0222	21.8003	-2.06357	-10.2525	20.3505
	41	TB7BB	0		11992	74.309	0.508	21.48	0.236244	0.169007	0.66	21.528	0.66	21.528	-1.43012	-10.517	20.0778
	42	TB8A-Bis	0		49872	550.575	-129.444	-193.7	2.59396	4.39619	-129.288	-193.651	-129.288	-193.651	-130.491	-219.56	-195.429
	43	UTM	0		10652	65.895	6.8465	28.4775	0.0979413	0.126366	7.0061	28.5279	7.0061	28.5279	4.87267	-3.71673	27.0883
	44	TB10A	0		10757	67.766	1.6985	25.3355	0.0392467	0.0562646	1.8619	25.3871	1.8619	25.3871	-0.236427	-6.76797	23.9428
	45	TB13A	0	low peak height	228	1.405	0.7425	21.918	0.0785952	1.23374	0.9097	21.9708	0.9097	21.9708	-1.18213	-10.0869	20.5213
	46	TB14A	0		6683	41.62	1.9705	25.541	0.182964	0.0536172	2.1415	25.595	2.1415	25.595	0.041265	-6.566	24.151
	47	TB14B	0		8866	56.228	0.326	23.1415	0.0696707	0.0503657	0.5008	23.1967	0.5008	23.1967	-1.58824	-8.89591	21.749
	48	TB15A	0		4870	30.197	-0.216	19.863	0.0127554	0.0411704	-0.0374	19.9194	-0.0374	19.9194	-2.12277	-12.0798	18.4667
	49	TB17BA	0		11933	75.775	1.6915	26.758	0.0427516	0.0412517	1.8739	26.8156	1.8739	26.8156	-0.224509	-5.3802	25.3734
	50	TBABB	0		9875	61.095	1.054	21.2065	0.0203273	0.0360236	1.2402	21.2653	1.2402	21.2653	-0.853884	-10.7722	19.8147
	51	TBACA	0		14699	93.273	2.9355	27.0835	0.264644	0.174214	3.1255	27.1435	3.1255	27.1435	1.01855	-5.06165	25.7018
	52	UTM	0		8640	53.226	6.426	27.9735	0.0201792	0.0315911	6.6198	28.0347	6.6198	28.0347	4.489	-4.19587	26.5944
	53	TB18A	0		12923	81.378	2.6075	26.197	0.138965	0.10832	2.8051	26.2594	2.8051	26.2594	0.700337	-5.92054	24.8164
	54	TB18B	0		13578	85.33	2.044	26.4165	0.0240146	0.03187	2.2454	26.4801	2.2454	26.4801	0.144456	-5.70614	25.0374
	55	TB19A	0		6497	40.451	1.538	25.3085	0.0545711	0.0617964	1.7432	25.3733	1.7432	25.3733	-0.354317	-6.78138	23.9289
	56	TB19B	0		9511	59.995	1.9125	20.968	0.00884873	0.0243475	2.1215	21.034	2.1215	21.034	0.0214015	-10.9969	19.583
	57	TB20A	0		10518	65.34	2.1905	25.9385	0.185901	0.118926	2.4033	26.0057	2.4033	26.0057	0.301278	-6.16701	24.5623
	58	TB21A	0		12143	77.039	2.07	25.553	0.0356202	0.0446184	2.2866	25.6214	2.2866	25.6214	0.185375	-6.54035	24.1774
	59	TB21B	0		14968	92.747	2.2155	27.02	0.0804686	0.0644888	2.4359	27.0896	2.4359	27.0896	0.333656	-5.11402	25.6479
	60	TB21C	0		12147	76.799	0.7795	24.4305	0.0150765	0.0409817	1.0037	24.5013	1.0037	24.5013	-1.08877	-7.62851	23.0556
	61	UTM	0		14530	91.191	6.678	28.199	0.0954186	0.0574169	6.906	28.271	6.906	28.271	4.77325	-3.9663	26.8311
	62	TB22A	0		9681	60.473	0.734	22.0725	0.0181191	0.0281833	0.9658	22.1457	0.9658	22.1457	-1.12641	-9.91694	20.6964
	63	TB23A	0		11842	75.065	0.439	18.5945	0.309183	0.233932	0.6746	18.6689	0.6746	18.6689	-1.41562	-13.2946	17.2143
	64	TB23B	0		14210	88.878	0.3295	18.6165	0.0306023	0.0384018	0.5689	18.6921	0.5689	18.6921	-1.5206	-13.2721	17.2376
	65	TB24A	0		11638	73.913	1.3185	22.0635	0.0424405	0.0391369	1.5617	22.1403	1.5617	22.1403	-0.534578	-9.92219	20.691
	66	TB25A	0		12299	76.413	2.2145	25.6995	0.026245	0.042358	2.4615	25.7775	2.4615	25.7775	0.359081	-6.3887	24.3338
	67	TB25B	0		14912	94.897	1.475	21.052	0.0789386	0.0789411	1.7258	21.1312	1.7258	21.1312	-0.371598	-10.9025	19.6804
	68	TB26A	0		12041	74.384	1.912	23.351	0.0286758	0.0405611	2.1666	23.4314	2.1666	23.4314	0.0661937	-8.6679	21.9841
	69	TB26B	0		15937	100.92	1.637	22.947	0.0852015	0.0641483	1.8954	23.0286	1.8954	23.0286	-0.203156	-9.05922	21.5807
	70	UTM	0		13037	81.373	6.508	28.099	0.0217601	0.0433912	6.7702	28.1818	6.7702	28.1818	4.63838	-4.05296	26.7417
	71	TB27A	0		13532	84.947	3.8915	24.7705	0.19707	0.126812	4.1575	24.8545	4.1575	24.8545	2.04351	-7.28538	23.4094
	72	TB29A	0		16648	104.584	0.8435	20.696	0.0286566	0.0186226	1.1133	20.7812	1.1133	20.7812	-0.979918	-11.2425	19.3299
	73	TB30A	0		11810	73.826	0.951	23.303	0.0648136	0.0623442	1.2246	23.3894	1.2246	23.3894	-0.869378	-8.7087	21.942
	74	TB31A	0		11937	75.935	0.6905	18.932	0.0346453	0.0487442	0.9679	19.0196	0.9679	19.0196	-1.12433	-12.9539	17.5656
	75	TB32A	0		9940	61.542	1.3635	19.904	0.0516943	0.0495146	1.6447	19.9928	1.6447	19.9928	-0.452145	-12.0084	18.5403
	76	TB33AA	0		7775	49.349	0.6385	18.671	0.0332761	0.0400911	0.9235	18.761	0.9235	18.761	-1.16842	-13.2051	17.3066
	77	TB33AB	0		10813	66.746	2.594	26.1615	0.0350685	0.0422291	2.8828	26.2527	2.8828	26.2527	0.777506	-5.92705	24.8097
	78	TB34AA	0		13847	87.357	1.6285	24.957	0.0266777	0.0289085	1.9211	25.0494	1.9211	25.0494	-0.177631	-7.09604	23.6046
	79	UTM	0		8384	51.891	6.4235	27.981	0.0683103	0.0614345	6.7199	28.0746	6.7199	28.0746	4.58842	-4.1571	26.6344
	80	TB34BA	0		13202	83.229	1.6165	23.5385	0.024077	0.047741	1.9167	23.6333	1.9167	23.6333	-0.182001	-8.47176	22.1863
											Linearity correction		Peak area Correction		Corrected
	Row	Identifier 1	Comment		Ampl 44	Area 44	d 13C/12C	d 18O/16O	stdev d13C	stdev d18O	d13C	d18O	d13C	d18O	d13C (PDB)	d18O(pdb)	d18O(smow)
	1	UTM1	0		6174	39.135	6.4185	27.821	0.0184581	0.0497644	6.4185	27.821	6.4185	27.821	4.28908	-4.40556	26.3782
	2	UTM2	0		10977	67.918	6.417	27.9475	0.0282613	0.0451608	6.4208	27.9492	6.4208	27.9492	4.29136	-4.28102	26.5066
	7	UTM3	0		16709	104.909	6.892	28.4015	0.0858283	0.0733328	6.9148	28.4117	6.9148	28.4117	4.78199	-3.83173	26.9698
	16	UTM	0		13518	84.886	6.5	28.063	0.0292284	0.0368944	6.557	28.0885	6.557	28.0885	4.42663	-4.1457	26.6461
	25	UTM	0		9990	62.071	6.7625	28.2175	0.149554	0.100859	6.8537	28.2583	6.8537	28.2583	4.72131	-3.98075	26.8162
	34	UTM	0		14325	95.097	6.49	28.0785	0.0284289	0.045975	6.6154	28.1346	6.6154	28.1346	4.48463	-4.10091	26.6923
	43	UTM	0		10652	65.895
	52	UTM	0		8640	53.226	6.426	27.9735	0.0201792	0.0315911	6.6198	28.0602	6.6198	28.0602	4.489	-4.17319	26.6178
	61	UTM	0		14530	91.191	6.678	28.199	0.0954186	0.0574169	6.906	28.301	6.906	28.301	4.77325	-3.93927	26.8589
	70	UTM	0		13037	81.373	6.508	28.099	0.0217601	0.0433912	6.7702	28.2163	6.7702	28.2163	4.63838	-4.02155	26.7741
	79	UTM	0		8384	51.891	6.4235	27.981	0.0683103	0.0614345	6.7199	28.1136	6.7199	28.1136	4.58842	-4.12131	26.6713
							6.585	28.1266	0.0623385	0.0563619	6.7446	28.198	6.7446	28.198	4.61295	-4.0393	26.7558
							0.172356	0.141842	0.0462269	0.0225627	0.139206	0.120931	0.139206	0.120931	0.138256	0.117477	0.121109

## Sheet: calibration dolomites
			Gas Bench Carbonates
			Date:		2017-06-07
			Operator:
			Standard		d13C (VPDB)	d18O (VPDB)	d18O VSMOW	d13C (raw)	d18O (raw)
					actual			measured
			NBS-19		1.95	-2.2	28.6	4.0105	30.2677
			NBS-18		-5.014	-23.2	7.2	-2.62075	8.6415
			Iceland Spar		-8.16	-11.3	19.23
			LSVEC		-46.6	-26.7
			WS-1		0.74	-3.35	26.2
			UTM		4.49	-4.28	26.4977
			Carrera
			Calibration	slope	intercept		linearity	peak area
			carbon_pdb	1.05018	-2.26174		0	0
			oxygen_PDB	0.971042	-31.5913		0	0
											Linearity correction		Peak area Correction		Corrected
	Row	Identifier 1	Comment		Ampl 44	Area 44	d 13C/12C	d 18O/16O	stdev d13C	stdev d18O	d13C	d18O	d13C	d18O	d13C (PDB)	d18O(pdb)	d18O(smow)
	1	UTM	0		12558	79.197	6.018	27.5305	0.016053	0.0237213	6.018	27.5305	6.018	27.5305	4.05823	-4.85799	25.9118
	2	Time Delay	1		5661	81.344	0.011	0.008	0.0343919	0.0396825	0.011	0.008	0.011	0.008	-2.25019	-31.5835	-1.64005
	3	UTM	1		20196	126.724	5.9505	27.6865	0.00626897	0.0340808	5.9505	27.6865	5.9505	27.6865	3.98735	-4.7065	26.068
	4	NBS-18	1		15143	96.933	-1.8245	9.3105	0.497353	0.404963	-1.8245	9.3105	-1.8245	9.3105	-4.17779	-22.5504	7.67237
	5	NBS-18	1		10674	66.739	-3.417	7.9725	0.0179527	0.032912	-3.417	7.9725	-3.417	7.9725	-5.85021	-23.8496	6.33294
	6	NBS-19	1		13286	84.405	4.901	30.646	0.34274	0.298782	4.901	30.646	4.901	30.646	2.88518	-1.8327	29.0306
	7	NBS-19	1		14229	90.627	3.12	29.8895	0.0158335	0.0295516	3.12	29.8895	3.12	29.8895	1.01482	-2.5673	28.2733
	8	UTM			15920	100.947	7.613	28.821	0.451963	0.361587	7.613	28.821	7.613	28.821	5.73327	-3.60486	27.2037
	9	BQ-6-2	2.702		6912	44.33	0.02	30.4165	0.0192146	0.00843801	0.02	30.4165	0.02	30.4165	-2.24074	-2.05556	28.8009
	10	BQ-5-28	2.624		19925	125.788	-1.141	28.9785	0.128018	0.095407	-1.141	28.9785	-1.141	28.9785	-3.46	-3.45192	27.3614
	11	BQ-5-20	0.708		8198	52.578	-1.5015	28.599	0.0123814	0.031132	-1.5015	28.599	-1.5015	28.599	-3.83859	-3.82043	26.9814
	12	BQ-5-14	1.158		5698	35.347	-2.3565	30.604	0.0457056	0.0263154	-2.3565	30.604	-2.3565	30.604	-4.73649	-1.87349	28.9886
	13	BQ-5-11	3.35		5653	35.868	-3.261	28.6135	0.014025	0.0045607	-3.261	28.6135	-3.261	28.6135	-5.68638	-3.80635	26.996
	14	BQ-4-4	2.27		10875	68.386	-1.5015	25.099	0.532801	0.445823	-1.5015	25.099	-1.5015	25.099	-3.83859	-7.21907	23.4777
	15	BQ-4-3	0.708		10571	66.721	-1.111	25.525	0.0425946	0.418863	-1.111	25.525	-1.111	25.525	-3.42849	-6.80541	23.9042
	16	BQ-4-20	0.556		6601	41.844	-0.67	27.5895	0.123223	0.131302	-0.67	27.5895	-0.67	27.5895	-2.96536	-4.80069	25.9709
	17	UTM	0.44		20063	127.199	5.982	27.5045	0.0184201	0.0278155	5.982	27.5045	5.982	27.5045	4.02043	-4.88323	25.8858
	18	BQ-4-18	1.018		8364	53.296	-0.864	28.634	0.197388	0.149366	-0.864	28.634	-0.864	28.634	-3.1691	-3.78644	27.0165
	19	BQ-4-11	1.468		8124	50.81	-0.279	25.311	0.0137949	0.00889944	-0.279	25.311	-0.279	25.311	-2.55474	-7.01321	23.6899
	20	BQ-2-1-5	1.842		6265	39.956	1.46	28.875	0.0349957	0.00826438	1.46	28.875	1.46	28.875	-0.728482	-3.55242	27.2577
	21	BQ-2-1-2	1.738		8205	50.931	-0.853	26.7615	0.00572713	0.00937017	-0.853	26.7615	-0.853	26.7615	-3.15755	-5.60472	25.142
	22	TB6BA		too low	347	2.178	0.581	23.259	0.0726719	0.144878	0.581	23.259	0.581	23.259	-1.65159	-9.00579	21.6357
	23	TB6BB		too low	409	2.506	0.1665	22.419	0.0505599	0.0717719	0.1665	22.419	0.1665	22.419	-2.08689	-9.82147	20.7949
	24	TB7BA			13789	87.361	1.674	24.11	0.259928	0.21152	1.674	24.11	1.674	24.11	-0.503743	-8.17943	22.4877
	25	TB8A			10817	67.945	0.2845	23.186	0.0311561	0.0227002	0.2845	23.186	0.2845	23.186	-1.96297	-9.07668	21.5627
	26	UTM	0.232		9760	61.331	6.576	28.032	0.19898	0.155739	6.576	28.032	6.576	28.032	4.64423	-4.37101	26.4138
	27	TB28BA		pretty low	1193	7.524	0.928	23.22	0.0309403	0.101416	0.928	23.22	0.928	23.22	-1.28718	-9.04366	21.5967
	28	TB28BB			4453	27.673	0.346	24.1825	0.0757806	0.0624604	0.346	24.1825	0.346	24.1825	-1.89838	-8.10903	22.5602
	29	TB29B			1622	10.258	1.282	25.1975	0.0131263	0.0675004	1.282	25.1975	1.282	25.1975	-0.915414	-7.12343	23.5763
	30	TB30B		too low	535	3.279	0.544	26.7255	0.127751	0.0257235	0.544	26.7255	0.544	26.7255	-1.69045	-5.63967	25.1059
	31	TB2BA			2826	17.836	0.5225	24.062	0.0105594	0.020204	0.5225	24.062	0.5225	24.062	-1.71302	-8.22604	22.4396
	32	BQ 10-9			2589	15.974	0.1795	31.674	0.0523116	0.0421272	0.1795	31.674	0.1795	31.674	-2.07324	-0.834472	30.0597
	33	BQ 7-8		pretty low	1305	8.175	0.823	30.6055	0.0414946	0.0664251	0.823	30.6055	0.823	30.6055	-1.39745	-1.87203	28.9901
	34	BQ 6-4			17627	111.255	0.639	30.325	0.167775	0.130369	0.639	30.325	0.639	30.325	-1.59068	-2.14441	28.7093
	35	UTM	0.402		10330	64.908	6.063	27.288	0.0158335	0.0102811	6.063	27.288	6.063	27.288	4.10549	-5.09346	25.669
	36	TB2BB			2132	13.402	0.2995	23.612	0.0684931	0.0189789	0.2995	23.612	0.2995	23.612	-1.94721	-8.66301	21.9891
	37	TB5A		too low	982	6.061	0.722	25.1085	0.0135167	0.0381667	0.722	25.1085	0.722	25.1085	-1.50351	-7.20985	23.4872
											Linearity correction		Peak area Correction		Corrected
	Row	Identifier 1	Comment		Ampl 44	Area 44	d 13C/12C	d 18O/16O	stdev d13C	stdev d18O	d13C	d18O	d13C	d18O	d13C (PDB)	d18O(pdb)	d18O(smow)
	3	UTM	1		20196	126.724	5.9505	27.6865	0.00626897	0.0340808	5.8963	27.6273	5.8963	27.6273	4.10457	-4.61251	26.1649
	8	UTM			15920	100.947	7.613	28.821	0.451963	0.361587	7.4233	28.6138	7.4233	28.6138	5.72141	-3.65194	27.1551
	17	UTM	0.44		20063	127.199	5.982	27.5045	0.0184201	0.0278155	5.5484	27.0309	5.5484	27.0309	3.7362	-5.19323	25.5662
	26	UTM	0.232		9760	61.331	6.576	28.032	0.19898	0.155739	5.8985	27.292	5.8985	27.292	4.1069	-4.93899	25.8283
	35	UTM	0.402		10330	64.908	6.063	27.288	0.0158335	0.0102811	5.1416	26.2816	5.1416	26.2816	3.30547	-5.92282	24.814

## Sheet: Data Export carbonates
ID	Date Analyzed	Run #	Sample ID	OUTCROP	FORMATION	Mass	Mineral	Type	Amplitude	d13C vpdb	d13C error	d18O vpdb	d18O error	Analyst	Researcher	Reacton Temperature	Reaction Time (hours)	Notes
		40	TB1A	Dabantagh	Pengliaba	0	Calcite		15152	-2.06357	±0.14	-10.2525	±0.12	Toti	Vinyet	50°C	2 hours
		41	TB7BB	Dabantagh	Pengliaba	0	Calcite		11992	-1.43012	±0.14	-10.517	±0.12	Toti	Vinyet	50°C	2 hours
		42	TB8A-BS	Dabantagh	Pengliaba	0	Calcite		49872	offscale	±0.14	offscale	±0.12	Toti	Vinyet	50°C	2 hours
		44	TB10A	Yijianfang	Yijianfang	0	Calcite		10757	-0.236427	±0.14	-6.76797	±0.12	Toti	Vinyet	50°C	2 hours
		45	TB13A	Yijianfang	Yijianfang	0	Calcite		228	no peak height	±0.14	no peak height	±0.12	Toti	Vinyet	50°C	2 hours
		46	TB14A	Yijianfang	Yijianfang	0	Calcite		6683	0.041265	±0.14	-6.566	±0.12	Toti	Vinyet	50°C	2 hours
		47	TB14B	Yijianfang	Yijianfang	0	Calcite		8866	-1.58824	±0.14	-8.89591	±0.12	Toti	Vinyet	50°C	2 hours
		48	TB15A	Yijianfang	Yijianfang	0	Calcite		4870	-2.12277	±0.14	-12.0798	±0.12	Toti	Vinyet	50°C	2 hours
		49	TB17BA	Yijianfang	Yijianfang	0	Calcite		11933	-0.224509	±0.14	-5.3802	±0.12	Toti	Vinyet	50°C	2 hours
		50	TB17BB	Yijianfang	Yijianfang	0	Calcite		9875	-0.853884	±0.14	-10.7722	±0.12	Toti	Vinyet	50°C	2 hours
		51	TB17CA	Yijianfang	Yijianfang	0	Calcite		14699	1.01855	±0.14	-5.06165	±0.12	Toti	Vinyet	50°C	2 hours
		53	TB18A	Yijianfang	Yijianfang	0	Calcite		12923	0.700337	±0.14	-5.92054	±0.12	Toti	Vinyet	50°C	2 hours
		54	TB18B	Yijianfang	Yijianfang	0	Calcite		13578	0.144456	±0.14	-5.70614	±0.12	Toti	Vinyet	50°C	2 hours
		55	TB19A	Yijianfang	Lianglitage	0	Calcite		6497	-0.354317	±0.14	-6.78138	±0.12	Toti	Vinyet	50°C	2 hours
		56	TB19B	Yijianfang	Lianglitage	0	Calcite		9511	0.0214015	±0.14	-10.9969	±0.12	Toti	Vinyet	50°C	2 hours
		57	TB20A	Yijianfang	Yijianfang	0	Calcite		10518	0.301278	±0.14	-6.16701	±0.12	Toti	Vinyet	50°C	2 hours
		58	TB21A	XikeEr	Yingshan	0	Calcite		12143	0.185375	±0.14	-6.54035	±0.12	Toti	Vinyet	50°C	2 hours
		59	TB21B	XikeEr	Yingshan	0	Calcite		14968	0.333656	±0.14	-5.11402	±0.12	Toti	Vinyet	50°C	2 hours
		60	TB21C	XikeEr	Yingshan	0	Calcite		12147	-1.08877	±0.14	-7.62851	±0.12	Toti	Vinyet	50°C	2 hours
		62	TB22A	XikeEr	Yingshan	0	Calcite		9681	-1.12641	±0.14	-9.91694	±0.12	Toti	Vinyet	50°C	2 hours
		63	TB23A	XikeEr	Yingshan	0	Calcite		11842	-1.41562	±0.14	-13.2946	±0.12	Toti	Vinyet	50°C	2 hours
		64	TB23B	XikeEr	Yingshan	0	Calcite		14210	-1.5206	±0.14	-13.2721	±0.12	Toti	Vinyet	50°C	2 hours
		65	TB24A	XikeEr	Yingshan	0	Calcite		11638	-0.534578	±0.14	-9.92219	±0.12	Toti	Vinyet	50°C	2 hours
		66	TB25A	XikeEr	Yingshan	0	Calcite		12299	0.359081	±0.14	-6.3887	±0.12	Toti	Vinyet	50°C	2 hours
		67	TB25B	XikeEr	Yingshan	0	Calcite		14912	-0.371598	±0.14	-10.9025	±0.12	Toti	Vinyet	50°C	2 hours
		68	TB26A	Keping	Pengliaba	0	Calcite		12041	0.0661937	±0.14	-8.6679	±0.12	Toti	Vinyet	50°C	2 hours
		69	TB26B	Keping	Pengliaba	0	Calcite		15937	-0.203156	±0.14	-9.05922	±0.12	Toti	Vinyet	50°C	2 hours
		71	TB27A	Keping	Pengliaba	0	Calcite		13532	2.04351	±0.14	-7.28538	±0.12	Toti	Vinyet	50°C	2 hours
		72	TB29A	Keping	Yingshan	0	Calcite		16648	-0.979918	±0.14	-11.2425	±0.12	Toti	Vinyet	50°C	2 hours
		73	TB30A	Keping	Yingshan	0	Calcite		11810	-0.869378	±0.14	-8.7087	±0.12	Toti	Vinyet	50°C	2 hours
		74	TB31A	Keping	Yijianfang	0	Calcite		11937	-1.12433	±0.14	-12.9539	±0.12	Toti	Vinyet	50°C	2 hours
		75	TB32A	Keping	Yijianfang	0	Calcite		9940	-0.452145	±0.14	-12.0084	±0.12	Toti	Vinyet	50°C	2 hours
		76	TB33AA	Keping	Yijianfang	0	Calcite		7775	-1.16842	±0.14	-13.2051	±0.12	Toti	Vinyet	50°C	2 hours
		77	TB33AB	Keping	Yijianfang	0	Calcite		10813	0.777506	±0.14	-5.92705	±0.12	Toti	Vinyet	50°C	2 hours
		78	TB34AA	Keping	Yijianfang	0	Calcite		13847	-0.177631	±0.14	-7.09604	±0.12	Toti	Vinyet	50°C	2 hours
		80	TB34BA	Keping	Yijianfang	0	Calcite		13202	-0.182001	±0.14	-8.47176	±0.12	Toti	Vinyet	50°C	2 hours
			TB6BA	Dabantagh	Yingshan		Dolomite		347	too low		too low		Toti	Vinyet	90°C		too low
			TB6BB	Dabantagh	Yingshan		Dolomite		409	too low		too low		Toti	Vinyet			too low
			TB7BA	Dabantagh	Pengliaba		Dolomite		13789	-0.503743		-8.17943		Toti	Vinyet
			TB8A	Dabantagh	Pengliaba		Dolomite		10817	-1.96297		-9.07668		Toti	Vinyet
			TB28BA	Keping	Pengliaba		Dolomite		1193	-1.28718		-9.04366		Toti	Vinyet			pretty low
			TB28BB	Keping	Pengliaba		Dolomite		4453	-1.89838		-8.10903		Toti	Vinyet
			TB29B	Keping	Yingshan		Dolomite		1622	-0.915414		-7.12343		Toti	Vinyet
			TB30B	Keping	Yingshan		Dolomite		535	too low		too low		Toti	Vinyet			too low
			TB2BA	Dabantagh	Pengliaba		Dolomite		2826	-1.71302		-8.22604		Toti	Vinyet
				Dabantagh	Pengliaba	2132	-1.94721		-8.66301		Toti	Vinyet
				Dabantagh	Pengliaba	982	too low		too low		Toti	Vinyet			too low

## Sheet: Isotopes Manuscript
SAMPLE TYPE	OUTCROP	FORMATION	MINERALOGY	d13C vpdb	d18O vpdb
Yinshan Fm	XikeEr	Yingshan	Calcite	0.185375	-6.54035
Yinshan Fm	XikeEr	Yingshan	Calcite	0.359081	-6.3887
Laminated cave-sediment fill	XikeEr	Yingshan	Non-pure calcite	0.333656	-5.11402
Calcite overgrowth	XikeEr	Yingshan	Non-pure calcite	-1.12641	-9.91694
Calcite overgrowth	XikeEr	Yingshan	Non-pure calcite	-0.534578	-9.92219
Calcite in vugs	XikeEr	Yingshan	Calcite	-1.08877	-7.62851
Calcite in vugs	XikeEr	Yingshan	Calcite	-0.371598	-10.9025
Palisade calcite in cavities	XikeEr	Yingshan	Calcite	-1.41562	-13.2946
Palisade calcite in cavities	XikeEr	Yingshan	Calcite	-1.5206	-13.2721
Pengliaba Fm	Dabantagh	Pengliaba	Dolomite	-1.71302	-8.22604
Dolomite cement in NE-SW fractures	Dabantagh	Pengliaba	Dolomite	-1.94721	-8.66301
Dolomite cement in NE-SW fractures	Dabantagh	Pengliaba	Dolomite	-0.503743	-8.17943
Dolomite cement within fault breccia	Dabantagh	Pengliaba	Dolomite	-1.96297	-9.07668
Calcite cement within fault breccia	Dabantagh	Pengliaba	Calcite	-1.43012	-10.517
Yijianfang Fm	Yijianfang	Yijianfang	Calcite	0.041265	-6.566
Yijianfang Fm	Yijianfang	Yijianfang	Calcite	-0.224509	-5.3802
Yijianfang Fm	Keping	Yijianfang	Calcite	0.777506	-5.92705
Calcite cement in NNE-SSW fractures	Keping	Yijianfang	Calcite	-1.12433	-12.9539
Calcite cement in NNE-SSW fractures	Keping	Yijianfang	Calcite	-1.16842	-13.2051
Calcite cement in NNE-SSW fractures	Yijianfang	Yijianfang	Calcite	-2.12277	-12.0798
Calcite cement in NW-SE fractures	Yijianfang	Yijianfang	Calcite	-0.236427	-6.76797
Calcite cement in NW-SE fractures	Yijianfang	Yijianfang	Calcite	0.301278	-6.16701
Calcite cement in NW-SE fractures	Yijianfang	Yijianfang	Calcite	1.01855	-5.06165
Calcite cement in NE-SE faults	Yijianfang	Yijianfang	Calcite	-0.853884	-10.7722
Calcite cement in NE-SE faults	Keping	Yijianfang	Calcite	-0.182001	-8.47176
Calcite cement in NE-SE faults	Keping	Yingshan	Calcite	-0.979918	-11.2425
Calcite cement in N-S faults	Yijianfang	Yijianfang	Calcite	0.700337	-5.92054
Calcite cement in N-S faults	Yijianfang	Lianglitage	Calcite	0.144456	-5.70614
Calcite cement in N-S faults	Keping	Yijianfang	Calcite	-0.177631	-7.09604
